# Supplementary material for: Chemistry and deposition in the Model of Atmospheric composition at Global and Regional scales using Inversion Techniques for Trace gas Emissions (MAGRITTE v1.0). Part B. Dry deposition
Source: Copernicus journal article supplement (doi:10.5194/gmd-2018-317), 2018-12-19
Supplement: Supplementary file 1 [file gmd-2018-317-supplement.pdf]

# Supplement to GMDD paper "Chemistry and deposition in the Model of Atmospheric composition at Global and Regional scales using Inversion Techniques for Trace gas Emissions (MAGRITTE v1.0). Part B. Dry deposition" by Müller et al.

## S1 Evaluation of HLC estimation methods

### 5 S1.1 Overview of methods

We consider direct HLC estimation methods as well as estimation methods for the liquid vapor pressure ( $p_0^L$ ) and the infinite dilution activity coefficient (IDAC). IDAC and  $p_0^L$  might be combined to estimate HLC (Eq. (6)). An overview of the methods is given in Table S1.

**Table S1.** Estimation methods considered in this work for the Henry's Law constant ( $k_h$ ), the liquid state saturation vapour pressure ( $p_0^L$ ), and the activity coefficient ( $\gamma$ ).

| method             | abbr.   | property        | remark |
|--------------------|---------|-----------------|--------|
| GROMHE             | grom    | $k_h$           | a      |
| Cabani             | Cab     | $k_h$           |        |
| EVAPORATION        | evap    | $p_0^L$         |        |
| Nannoolal          | Nan     | $p_0^L$         | b      |
| UNIFAC-Hansen      | Hansen  | $\gamma$        | c      |
| AIOMFAC            | aiom    | $\gamma$        | d      |
| AIOMFAC(m)         | aiom(m) | $\gamma$        |        |
| UNIFAC-Raatikainen | Raat    | $\gamma$        | c      |
| UNIFAC-Dortmund    | dort    | $\gamma$        | c      |
| AQUAFAC-Jain       | aqua    | $\gamma^\infty$ | a      |

<sup>a</sup> Estimates only at 298.15 K.

<sup>b</sup> Vapour pressure estimation method of Nannoolal et al. (2008), using the boiling point estimation method of Nannoolal et al. (2004) as input.

<sup>c</sup> Estimates  $\gamma$  at any organic-water composition (not only at infinite dilution).

<sup>d</sup> Estimates  $\gamma$  at any organic-inorganic-water composition (not only at infinite dilution).

The methods considered here estimating HLC directly from molecular structure are the method of Cabani et al. (1981) and the more recent GROMHE (GROup contribution Method for Henry's law Estimate, Raventos-Duran et al., 2010), which was developed specifically for atmospherically relevant compounds. Raventos-Duran et al. (2010) showed that GROMHE performed better than two other HLC estimation methods: HENRYWIN (Meylan and Howard, 2000) and SPARC (Hilal et al., 2008). These latter two methods are therefore not considered here.

The estimation methods of  $p_0^L$  include the group-contribution method EVAPORATION (Estimation of VApour Pressure of Organics Compennolle et al., 2011) and the vapour pressure estimation method of Nannoolal et al. (2008), with normal boiling points estimated with the method of Nannoolal et al. (2004).

A popular group-contribution method to estimate activity coefficients is UNIFAC (UNIQUAC Functional-group Activity Coefficients) (Fredenslund et al., 1977). Although UNIFAC estimates activity coefficients for mixtures of organic molecules and water in any concentration range, we only consider here infinite dilution activity coefficients. Several UNIFAC parameterisations exist. The parameterisation of Hansen et al. (1991) (UNIFAC-Hansen) has a broad coverage of functional groups, but was not developed for atmospheric compounds. Nonetheless, UNIFAC-Hansen is a starting point on which several other reparameterisations are build. Raatikainen and Laaksonen (2005) introduced reparameterisations for acid and hydroxyl groups and water (UNIFAC-Raatikainen), while keeping UNIFAC-Hansen parameters for the other groups. UNIFAC-Dortmund (Gmehling et al., 2002) was developed as a successor of the original UNIFAC, and has a different mathematical

framework. AIOMFAC (Aerosol Inorganic Organic Mixtures Functional groups Activity Coefficients, Zuend, 2011) can be considered as a generalisation of UNIFAC as it also covers mixtures with inorganic components. Regarding the organic part, it combines features of the UNIFAC versions of Peng et al. (2001) and Marcolli and Peter (2005), both developed specifically for atmospherically relevant compounds. These latter two methods are therefore not separately discussed. Finally, AQUAFAC (Aqueous Functional Group Activity Coefficients, Jain et al., 2008) estimates an IDAC from molecular structure and is based on data for compounds of pharmaceutical and environmental interest. As opposed to UNIFAC and AIOMFAC, it only calculates the activity coefficient at infinite dilution of the solute.

## S1.2 Scope of the methods

The HLC estimation method of Cabani et al. (1981), GROMHE and the IDAC estimation method AQUAFAC are applicable only to infinitely dilute aqueous solutions. The UNIFAC-like estimation methods (including AIOMFAC) treat water-organic mixtures in any concentration range. In addition, AIOMFAC treats also water-organic-inorganic mixtures (Zuend, 2011). GROMHE and AQUAFAC are limited to 298.15 K, while the other methods allow for a temperature dependence. Very recently, the temperature range of AIOMFAC has been extended (Ganbavale et al., 2015) to deal also with the low temperatures of the upper troposphere. Not all methods are designed for all molecule types considered here. The method of Cabani et al. (1981) and UNIFAC-Dortmund cannot treat mono-nitrates, hydroperoxides, peracids and peroxy acyl nitrates. AQUAFAC applies to mono-nitrates but not to the other molecule types just mentioned.

## S1.3 Modifications to AIOMFAC

AIOMFAC (Zuend, 2011) inherited parameters of the acid-water and acid-hydroxyl interaction groups from the UNIFAC version of Peng et al. (2001). However, this made estimations for monofunctional acids worse compared to the original UNIFAC-Hansen (see Tables S6 and S7). Therefore, two COOH groups are now considered: (i) COOH<sup>Hansen</sup> with the original parameters of Hansen et al. (1991), and (ii) COOH<sup>Peng</sup> with the parameters of Peng et al. (2001). These two groups differ in their interaction with H<sub>2</sub>O and the OH group. The following criterion is chosen to discriminate between both groups: a COOH group of a molecule is evaluated as COOH<sup>Hansen</sup> if there are no other hydrogen-bonding groups (OH, COOH, OOH or COOOH) in the molecule, and as COOH<sup>Peng</sup> if there are. With this criterion, mono-functional acids have the COOH<sup>Hansen</sup> group, while diacids and hydroxy-acids (used by Peng et al. (2001) to derive the parameters) have the COOH<sup>Peng</sup> group. This modification can be compared to the one applied by Marcolli and Peter (2005), where several CH<sub>n</sub> group were considered instead of one, depending on the molecular structure.

One of the CH<sub>n</sub> groups considered by AIOMFAC and inherited from Marcolli and Peter (2005) is the hydrophobic tail group CH<sub>n</sub><sup>tail</sup> (noted CH<sub>n</sub><sup>alc-tail</sup> in Zuend, 2011). This group was inserted to account for the tendency of alcohols with hydrophobic alkyl chains to form micelles (Marcolli and Peter, 2005). In AIOMFAC, it is only applied for molecules that contain OH groups and no other functionalities. Here, we also apply it to any molecules with hydrogen bonding groups. The exact procedure to identify CH<sub>n</sub> as CH<sub>n</sub><sup>tail</sup> is given by Marcolli and Peter (2005). Applying this group for monofunctional acids gives a further improvement for both  $k_h$  and  $\gamma^\infty$ .

The AIOMFAC interaction parameters for nitrates, hydroperoxides, peroxides, peracids and peroxy acyl nitrates were derived in the study of Compernelle et al. (2009) and are based on fittings to activity coefficients generated by SPARC 4.2. In that study, a procedure was followed to generate parameters independent of other UNIFAC-versions. However, we noticed that this leads to relatively bad parameters especially for the nitrate group and the PAN group. Essentially, we repeated the procedure of Compernelle et al. (2009), with the difference that instead of the interaction parameters of Table 5 in that study, parameters of UNIFAC-Hansen are used instead. The resulting parameters are given in Table S2.

## 40 S1.4 Extension of AQUAFAC

We extended the AQUAFAC method (Jain et al., 2008), such that it can also treat PANs, hydroperoxides, peracids and peroxides. HLC data (Sander, 2015) and  $p_L^0$  data (Egerton et al., 1951; Bruckmann and Willner, 1983) were first combined to obtain  $\gamma^\infty$  data, and group contributions were derived following a least square optimization of calculated vs. experimental  $\log_{10} \gamma^\infty$  data. These are presented in Table S3.

**Table S2.** Values of coefficients  $a_{mk}, a_{km}$  replacing those of Table 6 of Compornolle et al. (2009). They are derived by replacing first the parameters of Table 5 in the same study by experimental parameters of Hansen et al. (1991). The parameters of Table 7 of Compornolle et al. (2009) are unchanged.

| $m \backslash k$   | CH <sub>n</sub> ONO <sub>2</sub> | CH <sub>n</sub> OOH | COOOH       | CH <sub>n</sub> OOCH <sub>n</sub> | PAN         |
|--------------------|----------------------------------|---------------------|-------------|-----------------------------------|-------------|
| C=C                | 1.1E4, -323                      | 467, -58            | 743, 780    | 753, -269                         | 461, 60     |
| OH                 | -63, 843                         | -295, 144           | 1650, -465  | -3, 834                           | -91, 577    |
| H <sub>2</sub> O   | 309, 619                         | 58, 102             | 137, -4     | 51, 437                           | 211, 275    |
| CHO                | 349, -157                        | -386, 405           | 1.2E4, -514 | -11, 511                          | 286, -173   |
| CH <sub>n</sub> CO | -125, 113                        | -349, 433           | 723, -369   | -174, 443                         | 53, 16.6    |
| COOH               | -64, 1.14E4                      | -378, 1.2E4         | -413, 1.1E4 | -56, 1160                         | -282, 1.2E4 |
| CH <sub>n</sub> O  | 1.1E4, -356                      | -423, 661           | 1.2E4, -578 | 49, 55                            | 1.E4, -316  |
| CCOO               | 2036, -400                       | 1100, -425          | 646, -193   | -74, 207                          | 949, -342   |

**Table S3.** Newly derived AQUAFAC group contributions for hydroperoxides, peracids, peroxyacynitrates and peroxides.

| group      | contribution |
|------------|--------------|
| -OOH       | -1.041       |
| -C(=O)OOH  | -0.505       |
| -C(=O)OONO | 1.666        |
| COOC       | -0.85        |

### S1.5 Experimental data used for HLC evaluation

The methods are tested on monofunctional and polyfunctional compounds. For monofunctional compounds the following classes are considered: aldehydes, ketones, ethers, esters (non-formates), formates, alcohols, acids, nitrates, per-group members (either hydroperoxide or peracid) and peroxy acyl nitrates (PANs) (see Tables S6 and S7). A few polyfunctional classes are also tested: diols, dicarbonyls, diacids, polyols and functionalized diacids. The group 'others' in Table S6) includes various molecule types (e.g. dinitrates, hydroxynitrates, carbonyl nitrates, hydroxy hydroperoxides, hydroxy ethers).

We test two physical properties: HLC and IDAC, as they are both relevant to the aqueous phase. Methods that estimate one property can be combined with a vapour pressure estimation method (EVAPORATION or the Nannoolal method) to estimate the other property. A large part of the HLC data are retrieved from the compilation of Sander (2015), but regarding the polyfunctional compounds, we use also the HLC values derived recently (Compornolle et al., 2014a, b). The IDAC data originate to a large extent from Kojima et al. (1997). The HLC and IDAC experimental data are tabulated in Table S4 and Table S5 respectively, together with their assignment to a specific molecule class.

As some methods (GROMHE and AQUAFAC) provide estimations only at 298.15 K, we only use data within  $298.15 \pm 20$  K. For GROMHE, a fixed enthalpy of gas phase dissolution of 50 kJ/mol was used to correct for deviations from 298.15 K. A similar procedure was also applied by Raventos-Duran et al. (2010) to correct for small deviations from 298.15 K.

Table S4: Experimental HLC data used to test the methods.

| name                  | reference          | $T/K$  | $k_h \frac{\text{atm}}{\text{M}}$ |
|-----------------------|--------------------|--------|-----------------------------------|
| <i>mono-aldehydes</i> |                    |        |                                   |
| ethanal               | Sander_Buttery1969 | 298.15 | 15                                |
| propanal              | Sander_Buttery1969 | 298.15 | 13                                |
| butanal               | Sander_Buttery1969 | 298.15 | 8.7                               |
| pentanal              | Sander_Buttery1969 | 298.15 | 6.8                               |
| hexanal               | Sander_Buttery1969 | 298.15 | 4.7                               |
| heptanal              | Sander_Buttery1969 | 298.15 | 3.7                               |

Table S4: (Continued)

| name                       | reference                  | T/K    | $k_h \frac{\text{atm}}{\text{M}}$ |
|----------------------------|----------------------------|--------|-----------------------------------|
| octanal                    | Sander_Buttery1969         | 298.15 | 1.9                               |
| nonanal                    | Sander_Buttery1969         | 298.15 | 1.3                               |
| trans-2-butenal            | Sander_Buttery1971         | 298.15 | 52                                |
| 2-methyl-2-propenal        | Sander_Iraci1998           | 298.15 | 6.5                               |
| trans-2-hexenal            | Sander_Buttery1971         | 298.15 | 20                                |
| trans,trans-2,4-hexadienal | Sander_Buttery1971         | 298.15 | 10                                |
| trans-2-octenal            | Sander_Buttery1971         | 298.15 | 13                                |
| ethanal                    | Sander_Snider1985          | 298.15 | 13                                |
| ethanal                    | Sander_Betterton1988       | 298.15 | 11                                |
| ethanal                    | Sander_Zhou1990            | 298.15 | 17                                |
| ethanal                    | Sander_Benkelberg1995      | 298.15 | 13                                |
| propanal                   | Sander_Zhou1990            | 298.15 | 13                                |
| butanal                    | Sander_Zhou1990            | 298.15 | 9.6                               |
| pentanal                   | Sander_Zhou1990            | 298.15 | 6.4                               |
| hexanal                    | Sander_Zhou1990            | 298.15 | 4.9                               |
| heptanal                   | Sander_Zhou1990            | 298.15 | 3.3                               |
| octanal                    | Sander_Zhou1990            | 298.15 | 2.1                               |
| nonanal                    | Sander_Zhou1990            | 298.15 | 1                                 |
| decanal                    | Sander_Zhou1990            | 298.15 | 0.61                              |
| 2-propenal                 | Sander_Snider1985          | 298.15 | 7.4                               |
| <i>mono-ketones</i>        |                            |        |                                   |
| propanone                  | Sander_Burnett1963         | 298.15 | 28                                |
| propanone                  | Sander_Buttery1969         | 298.15 | 25                                |
| propanone                  | Sander_Vitenberg1975       | 298.15 | 25                                |
| propanone                  | Sander_Hoff1993            | 298.15 | 27                                |
| butanone                   | Sander_Buttery1969         | 298.15 | 21                                |
| butanone                   | Sander_Vitenberg1975       | 298.15 | 18                                |
| butanone                   | Sander_Friant1979          | 303    | 10                                |
| 2-pentanone                | Sander_Buttery1969         | 298.15 | 16                                |
| 2-heptanone                | Sander_Buttery1969         | 298.15 | 7                                 |
| 2-octanone                 | Sander_Buttery1969         | 298.15 | 5.4                               |
| 2-nonanone                 | Sander_Buttery1969         | 298.15 | 2.7                               |
| 2-undecanone               | Sander_Buttery1969         | 298.15 | 1.6                               |
| 3-buten-2-one              | Sander_Iraci1998           | 298.15 | 41                                |
| propanone                  | Sander_Snider1985          | 298.15 | 26                                |
| propanone                  | Sander_Zhou1990            | 298.15 | 35                                |
| propanone                  | Sander_Betterton1991       | 298.15 | 32                                |
| propanone                  | Sander_Benkelberg1995      | 298.15 | 27                                |
| butanone                   | Sander_Snider1985          | 298.15 | 18                                |
| butanone                   | Sander_Zhou1990            | 298.15 | 20                                |
| <i>mono-ethers</i>         |                            |        |                                   |
| ethoxyethane               | Sander_Signer1969          | 298.15 | 0.8                               |
| diisopropylether           | Sander_Nielsen1994         | 298.15 | 0.49                              |
| tetrahydrofuran            | Sander_Signer1969          | 298.15 | 22                                |
| 2-methoxy-2-methylpropane  | Sander_Robbins1993         | 298.15 | 1.6                               |
| 2-methoxy-2-methylpropane  | Callender and Davis (2001) | 298.15 | 1.2                               |

Table S4: (Continued)

| name                        | reference                   | T/K    | $k_h \frac{\text{atm}}{\text{M}}$ |
|-----------------------------|-----------------------------|--------|-----------------------------------|
| 1-propoxypropane            | Sander_Hartkopf1973         | 298.15 | 0.23                              |
| tetrahydrofuran             | Sander_Cabani1971           | 298.15 | 14                                |
| tetrahydropyran             | Sander_Cabani1971           | 298.15 | 8                                 |
| 2-methyltetrahydrofuran     | Sander_Cabani1971           | 298.15 | 11                                |
| 2,5-dimethyltetrahydrofuran | Sander_Cabani1971           | 298.15 | 5.7                               |
| 2-methoxy-2-methylpropane   | Bierwagen and Keller (2001) | 298.15 | 0.73                              |
| <i>mono-formates</i>        |                             |        |                                   |
| methylformate               | Sander_Hoff1993             | 298.15 | 4.1                               |
| methylformate               | Sander_Hartkopf1973         | 298.15 | 4.1                               |
| methylformate               | Kutsuna et al. (2005)       | 298.15 | 4.2                               |
| ethylformate                | Kutsuna et al. (2005)       | 298.15 | 3.4                               |
| propylformate               | Kutsuna et al. (2005)       | 298.15 | 2.6                               |
| <i>mono-esters</i>          |                             |        |                                   |
| methylacetate               | Sander_Butler1935           | 298.15 | 11                                |
| methylacetate               | Sander_Buttery1969          | 298.15 | 8.7                               |
| ethylacetate                | Sander_Butler1935           | 298.15 | 7.6                               |
| methylpropanoate            | Sander_Buttery1969          | 298.15 | 5.8                               |
| methylbutanoate             | Sander_Buttery1969          | 298.15 | 4.8                               |
| methylpentanoate            | Sander_Buttery1969          | 298.15 | 3.1                               |
| methylhexanoate             | Sander_Buttery1969          | 298.15 | 2.7                               |
| methyloctanoate             | Sander_Buttery1969          | 298.15 | 1.3                               |
| methylacetate               | Sander_Kieckbusch1979       | 298.15 | 7.8                               |
| ethylacetate                | Sander_Kieckbusch1979       | 298.15 | 5.9                               |
| propylacetate               | Sander_Kieckbusch1979       | 298.15 | 4.6                               |
| butylacetate                | Sander_Kieckbusch1979       | 298.15 | 3.6                               |
| pentylacetate               | Sander_Kieckbusch1979       | 298.15 | 2.8                               |
| ethylacetate                | Kutsuna et al. (2005)       | 298.15 | 6                                 |
| <i>mono-acids</i>           |                             |        |                                   |
| ethanoicacid                | Sander_Khan1995             | 298.15 | 5500                              |
| propanoicacid               | Sander_Butler1935           | 298.15 | 2300                              |
| propanoicacid               | Sander_Servant1991          | 298.15 | 6200                              |
| propanoicacid               | Sander_Khan1995             | 298.15 | 5700                              |
| butanoicacid                | Sander_Butler1935           | 298.15 | 1900                              |
| butanoicacid                | Sander_Khan1995             | 298.15 | 4700                              |
| pentanoicacid               | Sander_Khan1995             | 298.15 | 2200                              |
| 2-methylpropanoicacid       | Sander_Servant1991          | 298.15 | 5700                              |
| 2-methylpropanoicacid       | Sander_Khan1995             | 298.15 | 1100                              |
| 3-methylbutanoicacid        | Sander_Khan1995             | 298.15 | 1200                              |
| trimethylaceticacid         | Sander_Khan1995             | 298.15 | 350                               |
| 2-methylpropenoicacid       | Sander_Khan1995             | 298.15 | 2400                              |
| ethanoicacid                | Sander_Johnson1996          | 298.15 | 4100                              |
| hexanoicacid                | Sander_Khan1995             | 298.15 | 1400                              |
| <i>mono-alcohols</i>        |                             |        |                                   |
| ethanol                     | Sander_Butler1935           | 298.15 | 190                               |
| ethanol                     | Sander_Burnett1963          | 298.15 | 220                               |
| ethanol                     | Sander_Rohrschneider1973    | 298.15 | 230                               |

Table S4: (Continued)

| name                           | reference          | T/K    | $k_h \frac{\text{atm}}{\text{M}}$ |
|--------------------------------|--------------------|--------|-----------------------------------|
| 1-propanol                     | Sander_Butler1935  | 298.15 | 140                               |
| 1-propanol                     | Sander_Burnett1963 | 298.15 | 160                               |
| 1-butanol                      | Sander_Butler1935  | 298.15 | 120                               |
| 1-butanol                      | Sander_Buttery1969 | 298.15 | 110                               |
| 1-butanol                      | Sander_Burnett1963 | 298.15 | 140                               |
| 1-butanol                      | Sander_Friant1979  | 303    | 54                                |
| 1-pentanol                     | Sander_Butler1935  | 298.15 | 77                                |
| 1-hexanol                      | Sander_Butler1935  | 298.15 | 65                                |
| 1-hexanol                      | Sander_Buttery1969 | 298.15 | 59                                |
| 1-octanol                      | Sander_Buttery1969 | 298.15 | 40                                |
| 2-methyl-1-propanol            | Sander_Butler1935  | 298.15 | 84                                |
| 2-methyl-1-propanol            | Sander_Snider1985  | 298.15 | 100                               |
| 2-methyl-1-butanol             | Sander_Butler1935  | 298.15 | 71                                |
| 2-pentanol                     | Sander_Butler1935  | 298.15 | 68                                |
| 2-methyl-2-propanol            | Sander_Butler1935  | 298.15 | 84                                |
| 2-methyl-2-butanol             | Sander_Butler1935  | 298.15 | 73                                |
| 2-methyl-3-buten-2-ol          | Sander_Butler1935  | 303.15 | 65                                |
| ethanol                        | Sander_Snider1985  | 298.15 | 190                               |
| 1-propanol                     | Sander_Snider1985  | 298.15 | 150                               |
| 1-butanol                      | Sander_Snider1985  | 298.15 | 130                               |
| 2-propanol                     | Sander_Snider1985  | 298.15 | 130                               |
| 2-butanol                      | Sander_Snider1985  | 298.15 | 110                               |
| 2-methyl-2-propanol            | Sander_Snider1985  | 298.15 | 70                                |
| <i>mono-nitrates</i>           |                    |        |                                   |
| 1-propylnitrate                | Sander_Hauff1998   | 298.15 | 0.79                              |
| 2-propylnitrate                | Sander_Hauff1998   | 298.15 | 0.62                              |
| 1-butylnitrate                 | Sander_Hauff1998   | 298.15 | 0.65                              |
| 2-butylnitrate                 | Sander_Hauff1998   | 298.15 | 0.44                              |
| 1-pentylnitrate                | Sander_Kames1992   | 293    | 1.2                               |
| 1-pentylnitrate                | Sander_Hauff1998   | 298.15 | 0.6                               |
| 2-pentylnitrate                | Sander_Hauff1998   | 298.15 | 0.34                              |
| 3-pentylnitrate                | Sander_Hauff1998   | 298.15 | 0.37                              |
| 3-methylbutylnitrate           | Sander_Hauff1998   | 298.15 | 0.45                              |
| 1-hexylnitrate                 | Sander_Hauff1998   | 298.15 | 0.67                              |
| methylnitrate                  | Sander_Kames1992   | 298.15 | 2                                 |
| ethylnitrate                   | Sander_Kames1992   | 298.15 | 1.6                               |
| 1-propylnitrate                | Sander_Kames1992   | 298.15 | 1.1                               |
| 2-propylnitrate                | Sander_Kames1992   | 298.15 | 0.79                              |
| 1-butylnitrate                 | Sander_Kames1992   | 298.15 | 1                                 |
| 1-butylnitrate                 | Sander_Luke1989    | 298.15 | 1                                 |
| 2-butylnitrate                 | Sander_Kames1992   | 298.15 | 0.65                              |
| 2-butylnitrate                 | Sander_Luke1989    | 298.15 | 0.65                              |
| 2-methylpropylnitrate          | Sander_Kames1992   | 298.15 | 0.7                               |
| 2-pentylnitrate                | Sander_Kames1992   | 298.15 | 0.37                              |
| <i>mono-peroxyacylnitrates</i> |                    |        |                                   |
| peroxyacetylnitrate            | Sander_Holdren1984 | 283    | 5                                 |

Table S4: (Continued)

| name                      | reference                  | T/K    | $k_h \frac{\text{atm}}{\text{M}}$ |
|---------------------------|----------------------------|--------|-----------------------------------|
| peroxyacetylnitrate       | Sander_Kames1995           | 293    | 4.1                               |
| peroxypropionylnitrate    | Sander_Kames1995           | 293    | 2.9                               |
| peroxybutylnitrate        | Sander_Kames1995           | 293    | 2.3                               |
| peroxyisobutylnitrate     | Sander_Kames1995           | 293    | 1                                 |
| peroxy-2-propenoylnitrate | Sander_Kames1995           | 293    | 1.7                               |
| peroxyacetylnitrate       | Sander_Kames1991           | 298.15 | 2.8                               |
| <i>mono-pergroup</i>      |                            |        |                                   |
| hydroperoxymethane        | Sander_Lind1994            | 298.15 | 300                               |
| hydroperoxymethane        | Sander_OSullivan1996       | 298.15 | 310                               |
| hydroperoxyethane         | Sander_OSullivan1996       | 298.15 | 340                               |
| aceticperoxyacid          | Sander_Lind1994            | 298.15 | 670                               |
| aceticperoxyacid          | Sander_OSullivan1996       | 298.15 | 840                               |
| <i>dicarbonyls</i>        |                            |        |                                   |
| 2,3-butadione             | Sander_Snider1985          | 298.15 | 57                                |
| glyoxal                   | Sander_Zhou1990            | 298.15 | 360000                            |
| methylglyoxal             | Sander_Zhou1990            | 298.15 | 32000                             |
| 2,3-butadione             | Sander_Betterton1991       | 298.15 | 74                                |
| methylglyoxal             | Sander_Betterton1988       | 298.15 | 3700                              |
| <i>diols</i>              |                            |        |                                   |
| 1,2-ethanediol            | Sander_Bone1983            | 293    | 410000                            |
| 1,3-propanediol           | Sander_Bone1983            | 293    | 920000                            |
| 1,4-pentanediol           | Compernolle et al. (2014b) | 298.15 | 2.3e+06                           |
| 1,2-pentanediol           | Compernolle et al. (2014b) | 298.15 | 140000                            |
| 1,7-heptanediol           | Compernolle et al. (2014b) | 298.15 | 6.2e+06                           |
| 1,2-hexanediol            | Compernolle et al. (2014b) | 298.15 | 170000                            |
| 1,10-decanediol           | Compernolle et al. (2014b) | 298.15 | 2.7e+06                           |
| 2,5-hexanediol            | Compernolle et al. (2014b) | 298.15 | 1.4e+06                           |
| 2,4-pentanediol           | Compernolle et al. (2014b) | 298.15 | 390000                            |
| 1,9-nonanediol            | Compernolle et al. (2014b) | 298.15 | 3.1e+06                           |
| 1,2-propanediol           | Compernolle et al. (2014b) | 298.15 | 270000                            |
| 1,3-butanediol            | Compernolle et al. (2014b) | 298.15 | 710000                            |
| 1,2-ethanediol            | Compernolle et al. (2014b) | 298.15 | 660000                            |
| 1,5-pentanediol           | Compernolle et al. (2014b) | 298.15 | 7.1e+06                           |
| 1,2-butanediol            | Compernolle et al. (2014b) | 298.15 | 210000                            |
| 1,3-propanediol           | Compernolle et al. (2014b) | 298.15 | 1.6e+06                           |
| 2,3-butanediol            | Compernolle et al. (2014b) | 298.15 | 110000                            |
| 1,4-butanediol            | Compernolle et al. (2014b) | 298.15 | 3.5e+06                           |
| <i>diacids</i>            |                            |        |                                   |
| decanoicdiacid            | Compernolle et al. (2014a) | 298.15 | 7.7e+09                           |
| ethanoicdiacid            | Compernolle et al. (2014a) | 298.15 | 6.2e+08                           |
| octanoicdiacid            | Compernolle et al. (2014a) | 298.15 | 7.8e+09                           |
| butanoicdiacid            | Compernolle et al. (2014a) | 298.15 | 4.2e+09                           |
| propanoicdiacid           | Compernolle et al. (2014a) | 298.15 | 3.9e+10                           |
| heptanoicdiacid           | Compernolle et al. (2014a) | 298.15 | 8.2e+09                           |
| nonanoicdiacid            | Compernolle et al. (2014a) | 298.15 | 9e+09                             |
| pentanoicdiacid           | Compernolle et al. (2014a) | 298.15 | 5.2e+09                           |

Table S4: (Continued)

| name                                  | reference                  | $T/K$  | $k_h \frac{\text{atm}}{\text{M}}$ |
|---------------------------------------|----------------------------|--------|-----------------------------------|
| hexanoicdiacid                        | Compernolle et al. (2014a) | 298.15 | 6.7e+09                           |
| propanoicdiacid                       | Compernolle et al. (2014a) | 298.15 | 9.4e+09                           |
| pentanoicdiacid                       | Compernolle et al. (2014a) | 298.15 | 2.4e+09                           |
| butanoicdiacid                        | Compernolle et al. (2014a) | 298.15 | 2e+09                             |
| <i>polyols (&gt; 2 OH)</i>            |                            |        |                                   |
| 1,2,3-propanetriol                    | Compernolle et al. (2014b) | 298.15 | 4.8e+08                           |
| meso-erythritol                       | Compernolle et al. (2014b) | 298.15 | 1.1e+12                           |
| pentaerythritol                       | Compernolle et al. (2014b) | 298.15 | 7.4e+12                           |
| D-mannitol                            | Compernolle et al. (2014b) | 298.15 | 1.8e+17                           |
| adonitol                              | Compernolle et al. (2014b) | 298.15 | 4.7e+13                           |
| D-arabinitol                          | Compernolle et al. (2014b) | 298.15 | 6.8e+13                           |
| xylitol                               | Compernolle et al. (2014b) | 298.15 | 4e+13                             |
| galacticol                            | Compernolle et al. (2014b) | 298.15 | 9.1e+16                           |
| sorbitol                              | Compernolle et al. (2014b) | 298.15 | 6.7e+16                           |
| <i>func. diacids</i>                  |                            |        |                                   |
| 3-carboxylic-3-hydroxypentanoicdiacid | Compernolle et al. (2014a) | 298.15 | 1.1e+17                           |
| 2,3-dihydroxybutanoicdiacid           | Compernolle et al. (2014a) | 298.15 | 2.6e+17                           |
| <i>others</i>                         |                            |        |                                   |
| 1,4-dioxane                           | Sander_Rohrschneider1973   | 298.15 | 220                               |
| 1,4-dioxane                           | Sander_Friant1979          | 303    | 140                               |
| 2-oxopropanoicacid                    | Sander_Khan1991            | 298.15 | 310000                            |
| 1,2-ethylenedinitrate                 | Sander_Kames1992           | 293    | 640                               |
| 1,2-propylenedinitrate                | Sander_Kames1992           | 293    | 180                               |
| 2-nitrooxyethanol                     | Sander_Kames1992           | 293    | 40000                             |
| 1-nitrooxy-2-propanol                 | Sander_Kames1992           | 293    | 7300                              |
| 2-nitrooxy-1-propanol                 | Sander_Kames1992           | 293    | 6700                              |
| nitrooxyacetone                       | Sander_Kames1992           | 293    | 1000                              |
| 2-hydroxyethanal                      | Sander_Betterton1988       | 298.15 | 41000                             |
| 1,3-dioxolane                         | Sander_Cabani1971          | 298.15 | 40                                |
| 1,4-dioxane                           | Sander_Cabani1971          | 298.15 | 200                               |
| 2-oxopropanoicacid                    | Sander_Khan1995            | 298.15 | 310000                            |
| 2-nitrooxyethanol                     | Sander_Shepson1996         | 298.15 | 39000                             |
| 1-nitrooxy-2-propanol                 | Sander_Shepson1996         | 298.15 | 11000                             |
| 2-nitrooxy-1-propanol                 | Sander_Shepson1996         | 298.15 | 4500                              |
| 1-nitrooxy-2-butanol                  | Sander_Shepson1996         | 298.15 | 5800                              |
| 2-nitrooxy-1-butanol                  | Sander_Shepson1996         | 298.15 | 6000                              |
| 3-nitrooxy-2-butanol                  | Sander_Shepson1996         | 298.15 | 10000                             |
| hydroxymethylhydroperoxide            | Sander_OSullivan1996       | 298.15 | 1.7e+06                           |
| hydroxymethylhydroperoxide            | Sander_Staffelbach1993     | 298.15 | 1.6e+06                           |
| hydroxymethylhydroperoxide            | Sander_Zhou1992            | 298.15 | 480000                            |
| bis(hydroxymethyl)peroxide            | Sander_Zhou1992            | 298.15 | 450000                            |

Table S5: Experimental IDAC data used to test the methods.

| name                  | reference | $T/K$ | $\gamma^\infty$ |
|-----------------------|-----------|-------|-----------------|
| <i>mono-aldehydes</i> |           |       |                 |



Table S5: (Continued)

| name                | reference           | $T/K$  | $\gamma^\infty$ |
|---------------------|---------------------|--------|-----------------|
| octanal             | Kojima_Abraham1990  | 298.15 | 8920            |
| propanal            | Kojima_Dallas1993   | 298.15 | 13.03           |
| butanal             | Kojima_Dallas1993   | 298.15 | 48.6            |
| pentanal            | Kojima_Dallas1993   | 298.15 | 220.2           |
| hexanal             | Kojima_Dallas1993   | 298.15 | 813.4           |
| octanal             | Kojima_Li1992       | 298.15 | 8243            |
| ethanal             | Kojima_Mash1980     | 298.15 | 3.94            |
| ethanal             | Kojima_Pecsar1966   | 293.15 | 3.59            |
| ethanal             | Kojima_Pecsar1966   | 303.15 | 4.36            |
| ethanal             | Kojima_Pecsar1966   | 313.15 | 3.71            |
| propanal            | Kojima_Pecsar1966   | 293.15 | 14.7            |
| propanal            | Kojima_Pecsar1966   | 303.15 | 17.6            |
| propanal            | Kojima_Pecsar1966   | 313.15 | 15.4            |
| butanal             | Kojima_Pecsar1966   | 293.15 | 63              |
| butanal             | Kojima_Pecsar1966   | 303.15 | 73              |
| butanal             | Kojima_Pecsar1966   | 313.15 | 61              |
| heptanal            | Kojima_Sorensen1979 | 303.15 | 4178            |
| octanal             | Kojima_Sorensen1979 | 303.15 | 19230           |
| nonanal             | Kojima_Sorensen1979 | 303.15 | 75188           |
| <i>mono-ketones</i> |                     |        |                 |
| 2-nonanone          | Kojima_Abraham1990  | 298.15 | 24800           |
| propanone           | Kojima_Bao1993      | 298.15 | 7.69            |
| butanone            | Kojima_Bao1993      | 298.15 | 26.4            |
| 3-pentanone         | Kojima_Bao1993      | 298.15 | 106             |
| propanone           | Kojima_Dallas1993   | 298.15 | 7.01            |
| butanone            | Kojima_Dallas1993   | 298.15 | 25.6            |
| 2-pentanone         | Kojima_Dallas1993   | 298.15 | 93.4            |
| 2-hexanone          | Kojima_Dallas1993   | 298.15 | 355.7           |
| 2-heptanone         | Kojima_Dallas1993   | 298.15 | 1397            |
| 3-pentanone         | Kojima_Dallas1993   | 298.15 | 107.4           |
| 3-methyl-2-butanone | Kojima_Dallas1993   | 298.15 | 84              |
| cyclopentanone      | Kojima_Dallas1993   | 298.15 | 29.2            |
| propanone           | Kojima_Landau1991   | 298.15 | 7.31            |
| butanone            | Kojima_Landau1991   | 298.15 | 27.6            |
| 2-pentanone         | Kojima_Landau1991   | 298.15 | 102             |
| 3-pentanone         | Kojima_Landau1991   | 298.15 | 113             |
| propanone           | Kojima_Lee1963      | 288.15 | 5.85            |
| propanone           | Kojima_Lee1963      | 288.15 | 5.83            |
| propanone           | Kojima_Lee1963      | 303.15 | 7.65            |
| propanone           | Kojima_Lee1963      | 303.15 | 7.42            |
| 2-nonanone          | Kojima_LiCar1993    | 298.15 | 16290           |
| 5-methyl-2-hexanone | Kojima_Macedo1979   | 298.15 | 1520            |
| propanone           | Kojima_Mash1980     | 298.15 | 7.56            |
| butanone            | Kojima_Mash1980     | 298.15 | 27.8            |
| 2-pentanone         | Kojima_Mash1980     | 298.15 | 98.9            |
| 3-pentanone         | Kojima_Mash1980     | 298.15 | 113             |

Table S5: (Continued)

| name                      | reference             | $T/K$  | $\gamma^\infty$ |
|---------------------------|-----------------------|--------|-----------------|
| 3-hexanone                | Kojima_Mash1980       | 298.15 | 412             |
| butanone                  | Kojima_Othmer1947     | 298.15 | 25.98           |
| propanone                 | Kojima_Richon1985     | 303.15 | 7.69            |
| 2-heptanone               | Kojima_Sorensen1979   | 293.15 | 1435            |
| 2-heptanone               | Kojima_Sorensen1979   | 298.15 | 1468            |
| 4-heptanone               | Kojima_Sorensen1979   | 303.15 | 1653            |
| 5-nonanone                | Kojima_Sorensen1979   | 303.15 | 21700           |
| 3-methyl-2-pentanone      | Kojima_Sorensen1979   | 298.15 | 261             |
| 4-methyl-2-pentanone      | Kojima_Sorensen1979   | 298.15 | 292             |
| 3,3-dimethyl-2-butanone   | Kojima_Sorensen1979   | 298.15 | 288             |
| 2-methyl-3-pentanone      | Kojima_Sorensen1979   | 298.15 | 361             |
| 2,4-dimethyl-3-pentanone  | Kojima_Sorensen1979   | 298.15 | 1107            |
| 2,6-dimethyl-4-heptanone  | Kojima_Sorensen1979   | 298.15 | 8760            |
| cyclohexanone             | Kojima_Sorensen1979   | 298.15 | 54.1            |
| propanone                 | Kojima_Sorrentino1986 | 303.15 | 7.7             |
| butanone                  | Kojima_Sorrentino1986 | 303.15 | 29.5            |
| butanone                  | Kojima_Zhang1995      | 298.15 | 25.3            |
| <i>mono-ethers</i>        |                       |        |                 |
| 1-propoxypropane          | Kojima_Abraham1990    | 298.15 | 2330            |
| 1-butoxybutane            | Kojima_Abraham1990    | 298.15 | 37500           |
| 2-methoxy-2-methylpropane | Kojima_Dallas1993     | 298.15 | 112.5           |
| 1-propoxypropane          | Kojima_Dallas1993     | 298.15 | 1560            |
| diisopropylether          | Kojima_Dallas1993     | 298.15 | 496.1           |
| tetrahydrofuran           | Kojima_Dallas1993     | 298.15 | 17              |
| tetrahydropyran           | Kojima_Dallas1993     | 298.15 | 78.6            |
| ethoxyethane              | Kojima_Kohn1988       | 298.15 | 109.6           |
| 1-propoxypropane          | Kojima_Li1993         | 298.15 | 2315            |
| 1-butoxybutane            | Kojima_Li1993         | 298.15 | 47180           |
| diisopropylether          | Kojima_Li1993         | 298.15 | 628             |
| diisopropylether          | Kojima_LiCar1993      | 298.15 | 667             |
| 1-propoxypropane          | Kojima_LiCarr1993     | 298.15 | 2210            |
| 1-butoxybutane            | Kojima_LiCarr1993     | 298.15 | 28100           |
| ethoxyethane              | Kojima_Nielsen1994    | 296.15 | 72              |
| diisopropylether          | Kojima_Nielsen1994    | 296.15 | 639             |
| tetrahydrofuran           | Kojima_Pividal1992    | 293.15 | 16.6            |
| tetrahydrofuran           | Kojima_Pividal1992    | 308.15 | 23.5            |
| 1-methoxypropane          | Kojima_Sorensen1979   | 298.15 | 132             |
| 1-methoxybutane           | Kojima_Sorensen1979   | 298.15 | 546             |
| 2-methoxybutane           | Kojima_Sorensen1979   | 298.15 | 302             |
| 1-methoxy-2-methylpropane | Kojima_Sorensen1979   | 298.15 | 442             |
| 1-ethoxypropane           | Kojima_Sorensen1979   | 298.15 | 257             |
| 1-propoxypropane          | Kojima_Sorensen1979   | 298.15 | 1444            |
| 2-ethoxypropane           | Kojima_Sorensen1979   | 298.15 | 200             |
| 2-propoxypropane          | Kojima_Sorensen1979   | 298.15 | 1202            |
| ethoxyethane              | Kojima_Zhang1995      | 298.15 | 69.7            |
| tetrahydrofuran           | Kojima_Zhang1995      | 313.15 | 20.8            |

Table S5: (Continued)

| name                              | reference           | $T/K$  | $\gamma^\infty$ |
|-----------------------------------|---------------------|--------|-----------------|
| <i>mono-formates</i>              |                     |        |                 |
| methylformate                     | Kojima_Dallas1993   | 298.15 | 15.5            |
| ethylformate                      | Kojima_Dallas1993   | 298.15 | 47.3            |
| propylformate                     | Kojima_Dallas1993   | 298.15 | 169             |
| methylformate                     | Kojima_Pescar1966   | 293.15 | 16.1            |
| methylformate                     | Kojima_Pescar1966   | 303.15 | 17.4            |
| methylformate                     | Kojima_Pescar1966   | 313.15 | 14.2            |
| ethylformate                      | Kojima_Pescar1966   | 293.15 | 46              |
| ethylformate                      | Kojima_Pescar1966   | 303.15 | 51              |
| ethylformate                      | Kojima_Pescar1966   | 313.15 | 41              |
| propylformate                     | Kojima_Pescar1966   | 293.15 | 150             |
| propylformate                     | Kojima_Pescar1966   | 303.15 | 168             |
| propylformate                     | Kojima_Pescar1966   | 313.15 | 131             |
| methylacetate                     | Kojima_Dallas1993   | 298.15 | 22.6            |
| <i>mono-esters (non-formates)</i> |                     |        |                 |
| ethylacetate                      | Kojima_Dallas1993   | 298.15 | 65.3            |
| propylacetate                     | Kojima_Dallas1993   | 298.15 | 242             |
| butylacetate                      | Kojima_Dallas1993   | 298.15 | 814             |
| pentylacetate                     | Kojima_Dallas1993   | 298.15 | 3233            |
| hexylacetate                      | Kojima_Dallas1993   | 298.15 | 12490           |
| isopropylacetate                  | Kojima_Dallas1993   | 298.15 | 195.5           |
| isobutylacetate                   | Kojima_Dallas1993   | 298.15 | 844.4           |
| isopentylacetate                  | Kojima_Dallas1993   | 298.15 | 2977            |
| ethylpropanoate                   | Kojima_Dallas1993   | 298.15 | 256             |
| ethylbutanoate                    | Kojima_Dallas1993   | 298.15 | 730             |
| methylpropanoate                  | Kojima_Melder1978   | 293.15 | 87.1            |
| methylbutanoate                   | Kojima_Melder1978   | 293.15 | 331             |
| methylpentanoate                  | Kojima_Melder1978   | 293.15 | 1259            |
| methylhexanoate                   | Kojima_Melder1978   | 293.15 | 3981            |
| ethylacetate                      | Kojima_Pividal1992  | 288.15 | 63.9            |
| butylacetate                      | Kojima_Sorensen1979 | 298.15 | 799.5           |
| isopentylacetate                  | Kojima_Sorensen1979 | 303.15 | 3146            |
| cyclohexylacetate                 | Kojima_Sorensen1979 | 298.15 | 2720            |
| methylbutanoate                   | Kojima_Sorensen1979 | 294.15 | 358.9           |
| ethylpropanoate                   | Kojima_Sorensen1979 | 298.15 | 260             |
| ethylbutanoate                    | Kojima_Sorensen1979 | 295.15 | 1041            |
| propylpropanoate                  | Kojima_Sorensen1979 | 298.15 | 1019            |
| ethylpentanoate                   | Kojima_Sorensen1979 | 298.15 | 2880            |
| propylbutanoate                   | Kojima_Sorensen1979 | 290.15 | 4454            |
| butylpentanoate                   | Kojima_Sorensen1979 | 298.15 | 19400           |
| isopropylbutanoate                | Kojima_Sorensen1979 | 298.15 | 3077            |
| ethylacrylate                     | Kojima_Sorensen1979 | 293.15 | 257             |
| vinylacetate                      | Kojima_Sorensen1979 | 293.15 | 416             |
| methylacetate                     | Kojima_Zhang1995    | 313.15 | 27.2            |
| ethylacetate                      | Kojima_Zhang1995    | 313.15 | 84.5            |
| <i>mono-acids</i>                 |                     |        |                 |

Table S5: (Continued)

| name                 | reference             | $T/K$  | $\gamma^\infty$ |
|----------------------|-----------------------|--------|-----------------|
| ethanoicacid         | Kojima_Hwang1992      | 298.15 | 2.9             |
| hexanoicacid         | Kojima_Hwang1992      | 298.15 | 468             |
| pentanoicacid        | Kojima_Sorensen1979   | 298.15 | 127             |
| hexanoicacid         | Kojima_Sorensen1979   | 298.15 | 470.5           |
| heptanoicacid        | Kojima_Sorensen1979   | 303.15 | 2523            |
| butanoicacid         | Kojima_Tochigi1977    | 298.15 | 52.9            |
| <i>mono-alcohols</i> |                       |        |                 |
| ethanol              | Kojima_Abraham1990    | 298.15 | 3.73            |
| 1-propanol           | Kojima_Abraham1990    | 298.15 | 13.5            |
| 1-butanol            | Kojima_Abraham1990    | 298.15 | 52.24           |
| 1-pentanol           | Kojima_Abraham1990    | 298.15 | 208.9           |
| 1-hexanol            | Kojima_Abraham1990    | 298.15 | 738.9           |
| 2-methyl-1-propanol  | Kojima_Altsybeeva1964 | 298.15 | 48.4            |
| 2-methyl-2-propanol  | Kojima_Altsybeeva1964 | 298.15 | 12.2            |
| 2-propanol           | Kojima_Bergmann1991   | 317.85 | 8.8             |
| ethanol              | Kojima_Dallas1993     | 298.15 | 3.74            |
| ethanol              | Kojima_Dallas1993     | 298.15 | 3.69            |
| 1-propanol           | Kojima_Dallas1993     | 298.15 | 13.36           |
| 1-butanol            | Kojima_Dallas1993     | 298.15 | 50.2            |
| 1-pentanol           | Kojima_Dallas1993     | 298.15 | 198.1           |
| 1-hexanol            | Kojima_Dallas1993     | 298.15 | 799             |
| 2-methyl-1-propanol  | Kojima_Dallas1993     | 298.15 | 49              |
| 3-methyl-1-butanol   | Kojima_Dallas1993     | 298.15 | 208             |
| 2-propanol           | Kojima_Dallas1993     | 298.15 | 7.47            |
| 2-methyl-2-propanol  | Kojima_Dallas1993     | 298.15 | 11.9            |
| cyclohexanol         | Kojima_Dallas1993     | 298.15 | 157             |
| 1-hexanol            | Kojima_Djerki1988     | 298.15 | 645             |
| 1-butanol            | Kojima_Hofstee1960    | 313.15 | 49.5            |
| ethanol              | Kojima_Landau1991     | 298.15 | 4.03            |
| 1-propanol           | Kojima_Landau1991     | 298.15 | 15              |
| 1-butanol            | Kojima_Landau1991     | 298.15 | 53.7            |
| 2-propanol           | Kojima_Landau1991     | 298.15 | 7.75            |
| 2-butanol            | Kojima_Landau1991     | 298.15 | 22.4            |
| 1-pentanol           | Kojima_Larkin1973     | 298.15 | 197.5           |
| 1-pentanol           | Kojima_Lebert1984     | 298.15 | 192             |
| ethanol              | Kojima_LiCar1993      | 298.15 | 3.8             |
| 1-propanol           | Kojima_LiCar1993      | 298.15 | 14.17           |
| 1-butanol            | Kojima_LiCar1993      | 298.15 | 53.33           |
| 1-hexanol            | Kojima_LiCar1993      | 298.15 | 791.8           |
| 1-pentanol           | Kojima_LiCarr1993     | 298.15 | 225.4           |
| 1-butanol            | Kojima_Mash1980       | 298.15 | 51.6            |
| 1-pentanol           | Kojima_Mash1980       | 298.15 | 197             |
| 1-heptanol           | Kojima_Mash1980       | 298.15 | 3270            |
| 2-propanol           | Kojima_Mash1980       | 298.15 | 8.13            |
| 2-butanol            | Kojima_Mash1980       | 298.15 | 26.2            |
| 2-pentanol           | Kojima_Mash1980       | 298.15 | 97              |

Table S5: (Continued)

| name                       | reference            | $T/K$  | $\gamma^\infty$ |
|----------------------------|----------------------|--------|-----------------|
| 2-hexanol                  | Kojima_Mash1980      | 298.15 | 282             |
| 1-propanol                 | Kojima_Pecsar1966    | 293.15 | 24              |
| 1-propanol                 | Kojima_Pecsar1966    | 303.15 | 26              |
| 1-propanol                 | Kojima_Pecsar1966    | 313.15 | 22              |
| ethanol                    | Kojima_Pecsar1996    | 293.15 | 6.51            |
| ethanol                    | Kojima_Pecsar1996    | 303.15 | 6.15            |
| ethanol                    | Kojima_Pecsar1996    | 313.15 | 5.5             |
| ethanol                    | Kojima_Pividal1992   | 283.15 | 4.38            |
| ethanol                    | Kojima_Pividal1992   | 293.15 | 4.81            |
| ethanol                    | Kojima_Pividal1992   | 313.15 | 5.17            |
| 2-propanol                 | Kojima_Pividal1992   | 298.15 | 12.9            |
| ethanol                    | Kojima_Prausnitz1992 | 298.15 | 3.83            |
| ethanol                    | Kojima_Prausnitz1992 | 298.15 | 3.88            |
| ethanol                    | Kojima_Prausnitz1992 | 303.15 | 4.12            |
| 2-methyl-1-propanol        | Kojima_Sagert1986    | 293.15 | 44.4            |
| 2-butanol                  | Kojima_Sagert1986    | 293.15 | 20.8            |
| 2-methyl-2-propanol        | Kojima_Sagert1986    | 293.15 | 11.4            |
| 1-pentanol                 | Kojima_Sorensen1979  | 298.15 | 270             |
| 1-octanol                  | Kojima_Sorensen1979  | 298.15 | 11605           |
| 1-nonanol                  | Kojima_Sorensen1979  | 298.15 | 46260           |
| 1-decanol                  | Kojima_Sorensen1979  | 298.15 | 176500          |
| 1-dodecanol                | Kojima_Sorensen1979  | 298.15 | 3.876e+06       |
| 1-tetradecanol             | Kojima_Sorensen1979  | 298.15 | 3.97e+07        |
| 2-methyl-1-butanol         | Kojima_Sorensen1979  | 298.15 | 161             |
| 2,2-dimethyl-1-propanol    | Kojima_Sorensen1979  | 298.15 | 136             |
| 2,2-dimethyl-1-butanol     | Kojima_Sorensen1979  | 298.15 | 742             |
| 3-hexanol                  | Kojima_Sorensen1979  | 298.15 | 348             |
| 3-methyl-2-pentanol        | Kojima_Sorensen1979  | 298.15 | 288             |
| 4-methyl-2-pentanol        | Kojima_Sorensen1979  | 298.15 | 350             |
| 3,3-dimethyl-2-butanol     | Kojima_Sorensen1979  | 298.15 | 229             |
| 2-methyl-3-pentanol        | Kojima_Sorensen1979  | 298.15 | 278             |
| 2,2-dimethyl-3-pentanol    | Kojima_Sorensen1979  | 298.15 | 781             |
| 2,4-dimethyl-3-pentanol    | Kojima_Sorensen1979  | 298.15 | 916             |
| 1-hexene-3-ol              | Kojima_Sorensen1979  | 298.15 | 216             |
| 4-hexene-3-ol              | Kojima_Sorensen1979  | 298.15 | 141             |
| 2-methyl-4-penten-3-ol     | Kojima_Sorensen1979  | 298.15 | 177             |
| 2-methyl-2-pentanol        | Kojima_Sorensen1979  | 298.15 | 170             |
| 3-methyl-3-pentanol        | Kojima_Sorensen1979  | 298.15 | 128             |
| 2,3-dimethyl-2-butanol     | Kojima_Sorensen1979  | 298.15 | 131             |
| 2-methyl-2-hexanol         | Kojima_Sorensen1979  | 298.15 | 660             |
| 3-methyl-3-hexanol         | Kojima_Sorensen1979  | 298.15 | 537             |
| 2,3-dimethyl-2-pentanol    | Kojima_Sorensen1979  | 298.15 | 413             |
| 2,4-dimethyl-2-pentanol    | Kojima_Sorensen1979  | 298.15 | 476             |
| 2,3-dimethyl-3-pentanol    | Kojima_Sorensen1979  | 298.15 | 388             |
| 3-ethyl-3-pentanol         | Kojima_Sorensen1979  | 298.15 | 379             |
| 2,2,3-trimethyl-3-pentanol | Kojima_Sorensen1979  | 298.15 | 1040            |

Table S5: (Continued)

| name                        | reference                  | $T/K$  | $\gamma^\infty$ |
|-----------------------------|----------------------------|--------|-----------------|
| <i>diols</i>                |                            |        |                 |
| 1,3-nonanediol              | Kojima_Macedo1979          | 298.15 | 610             |
| 2,4-dimethyl-2,4-nonanediol | Kojima_Macedo1979          | 298.15 | 2480            |
| 2-propyl-1,3-heptanediol    | Kojima_Macedo1979          | 298.15 | 940             |
| 1,2-ethanediol              | Suleiman and Eckert (1994) | 297.45 | 0.8             |
| 1,2-ethanediol              | Suleiman and Eckert (1994) | 308.15 | 0.8             |
| 1,2-ethanediol              | Suleiman and Eckert (1994) | 317.85 | 1               |
| 1,3-propanediol             | Suleiman and Eckert (1994) | 297.95 | 1.2             |
| 1,3-propanediol             | Suleiman and Eckert (1994) | 307.85 | 1.2             |
| 1,4-butanediol              | Suleiman and Eckert (1994) | 299.35 | 2.8             |
| 1,4-butanediol              | Suleiman and Eckert (1994) | 309.05 | 2.8             |
| 2,3-butanediol              | Suleiman and Eckert (1994) | 298.95 | 1.6             |
| 2,3-butanediol              | Suleiman and Eckert (1994) | 308.85 | 1.7             |
| 1,2-propanediol             | Suleiman and Eckert (1994) | 296.75 | 1               |
| 1,2-propanediol             | Suleiman and Eckert (1994) | 308.25 | 1.1             |
| 1,2-butanediol              | Suleiman and Eckert (1994) | 299.15 | 2               |
| 1,2-butanediol              | Suleiman and Eckert (1994) | 308.35 | 2.1             |
| 1,2-butanediol              | Suleiman and Eckert (1994) | 318.05 | 2.2             |
| 1,3-butanediol              | Suleiman and Eckert (1994) | 299.05 | 2.2             |
| 1,3-butanediol              | Suleiman and Eckert (1994) | 308.75 | 2.3             |

### S1.6 Results of HLC evaluation

The standard deviation of an estimation method vs. experimental values is calculated as

$$SD = 1/\sqrt{N} \sqrt{\sum_{i=1}^N (U_{\text{est}} - U_{\text{exp}})^2} \quad (1)$$

with  $U$  either  $\log_{10}(k_h)$  or  $\log_{10}(\gamma^\infty)$ , and  $i$  running over the molecules of the specific molecule class. In Tables S6 and S7, the SD is given per method and per molecule class. Colours green ( $SD < 0.5$ ), orange ( $0.5 < SD < 1.0$ ) and red ( $SD > 1.0$ ) are used to indicate the performance.

In general, the methods perform worse for polyfunctional molecules compared to monofunctional molecules. The direct HLC estimation method of Cabani et al. (1981) performs well for monofunctional compounds (except for nitrates, which are not covered by this method). However, for polyfunctional compounds large errors are found, and for the polyol class (more than 2 hydroxyl groups) the method largely fails. The recently developed HLC estimation method GROMHE (Raventos-Duran et al., 2010) performs clearly better for the diols, but for the other polyfunctional classes errors are also large.

The performance of UNIFAC-Raatikainen is the worst among all UNIFAC-like methods. This is mainly due to the reparameterisation of the  $\text{CH}_n\text{-H}_2\text{O}$  based on data for some polyfunctional molecules (diacids and functionalized diacids), which makes the method less suitable for other molecule types. This method is not recommended.

Of all tested methods, the combination EVAPORATION-AIOMFAC has the best performance, giving also reasonable values for polyols, diacids and functionalized diacids. However, its performance regarding mono-acids, mono-nitrates, mono-PANs and dicarbonyls is relatively poor. Therefore, a slightly modified AIOMFAC version has also been devised and tested (AIOMFAC(m), see Subsection S1.3). These changes are found to reduce the errors for mono-acids, mono-nitrates, mono-PANS and dicarbonyls, at the expense of a slight worsening for mono-aldehydes.

GROMHE has the largest number of molecule classes with 'low' (green in Tables S6 and S7) standard deviations, mostly for monofunctional molecules. AIOMFAC(m) combined with EVAPORATION (ev/aiom(m) in Tables S6 and S7) has the

**Table S6.** Standard deviation estimation methods vs. experimental values in  $\log_{10}$  units for HLCs.  $N$  is the number of measurements for evaluation.

| scope         | $N$ | grom | evap<br>Han | evap<br>aiom | evap<br>aiom(m) | evap<br>Raat | evap<br>dort | evap<br>aqua |
|---------------|-----|------|-------------|--------------|-----------------|--------------|--------------|--------------|
| all           | 216 | 0.9  | 0.8         | 0.7          | 0.6             | 1.7          | nan†         | 0.9          |
| filtered**    | 161 | 1.0  | 0.8         | 0.7          | 0.5             | 1.8          | 1.1          | 1.0          |
| monoaldehydes | 26  | 0.3  | 0.5         | 0.5          | 0.6             | 0.9          | 0.5          | 0.4          |
| monoketones   | 19  | 0.2  | 0.4         | 0.4          | 0.4             | 0.7          | 0.4          | 0.7          |
| monoethers    | 11  | 0.5  | 0.6         | 0.6          | 0.6             | 0.4          | 0.3          | 0.8          |
| monoesters    | 14  | 0.1  | 0.2         | 0.2          | 0.2             | 0.5          | 0.2          | 0.3          |
| monoformates  | 5   | 0.0  | 0.2         | 0.2          | 0.2             | 0.2          | 0.1          | 0.4          |
| monoalcohols  | 26  | 0.2  | 0.5         | 0.4          | 0.4             | 1.2          | 0.4          | 0.8          |
| monoacids     | 14  | 0.4  | 0.4         | 0.6          | 0.3             | 0.5          | 0.4          | 0.3          |
| mononitrates* | 20  | 0.2  | 0.8         | 0.8          | 0.4             | 1.2          | nan          | 0.2          |
| monopans*     | 7   | 0.3  | 1.3         | 1.3          | 0.9             | 1.5          | nan          | 0.2          |
| monoper*      | 5   | 0.1  | 0.3         | 0.2          | 0.3             | 1.5          | nan          | 0.7          |
| dicarbonyls   | 5   | 1.0  | 2.4         | 2.4          | 0.0             | 2.4          | 2.4          | 2.5          |
| diols         | 18  | 0.4  | 0.9         | 0.5          | 0.5             | 2.0          | 1.1          | 0.7          |
| diacids       | 12  | 1.7  | 0.9         | 0.5          | 0.5             | 0.5          | 1.3          | 0.5          |
| polyols       | 9   | 1.5  | 1.0         | 0.6          | 0.6             | 6.1          | 2.9          | 2.6          |
| func. diacids | 2   | 6.7  | 2.8         | 2.1          | 2.1             | 0.8          | 3.7          | 1.5          |
| others*       | 23  | 0.7  | 0.7         | 0.6          | 0.8             | 1.2          | nan          | 0.8          |
| scope         | $N$ | grom | evap<br>Han | evap<br>aiom | evap<br>aiom(m) | evap<br>Raat | evap<br>dort | evap<br>aqua |
| all           | 216 | nan  | 1.3         | 1.2          | 1.3             | 2.0          | nan          | 1.5          |
| filtered**    | 161 | 3.5  | 0.9         | 0.7          | 0.7             | 2.0          | 1.1          | 1.3          |
| monoaldehydes | 26  | 0.32 | 0.5         | 0.5          | 0.5             | 0.9          | 0.5          | 0.5          |
| monoketones   | 19  | 0.1  | 0.5         | 0.5          | 0.5             | 0.7          | 0.3          | 0.7          |
| monoethers    | 11  | 0.3  | 0.6         | 0.6          | 0.6             | 0.4          | 0.3          | 0.8          |
| monoesters    | 14  | 0.1  | 0.3         | 0.3          | 0.3             | 0.5          | 0.2          | 0.4          |
| monoformates  | 5   | 0.2  | 0.1         | 0.1          | 0.1             | 0.2          | 0.1          | 0.3          |
| monoalcohols  | 26  | 0.1  | 0.7         | 0.5          | 0.5             | 1.0          | 0.5          | 1.0          |
| monoacids     | 14  | 0.3  | 0.5         | 0.4          | 0.5             | 0.4          | 0.5          | 0.6          |
| mononitrates* | 20  | nan  | 0.9         | 0.9          | 0.5             | 1.3          | nan          | 0.2          |
| monopans*     | 7   | nan  | 2.8         | 2.8          | 3.2             | 2.5          | nan          | 3.9          |
| monoper*      | 5   | nan  | 3.4         | 3.4          | 3.1             | 2.2          | nan          | 3.6          |
| dicarbonyls   | 5   | 2.4  | 1.7         | 1.7          | 1.7             | 1.7          | 1.7          | 1.9          |
| diols         | 18  | 1.1  | 1.1         | 0.7          | 0.7             | 1.9          | 1.4          | 1.0          |
| diacids       | 12  | 0.8  | 2.0         | 1.4          | 1.4             | 1.5          | 2.4          | 1.4          |
| polyols       | 9   | 14.5 | 0.9         | 1.2          | 1.2             | 7.5          | 1.7          | 4.0          |
| func. diacids | 2   | 2.5  | 2.3         | 1.7          | 1.7             | 0.7          | 3.2          | 1.8          |
| others*       | 23  | nan  | 2.0         | 2.0          | 2.3             | 1.8          | nan          | 1.7          |

Method abbreviations are defined in Table S1.

\* Some methods cannot do estimations for these molecule classes.

\*\* Molecule classes marked with \* are not taken into account in this group. In this way, all methods can be compared.

† nan ('not a number'): some or all molecules in this class could not be treated by the method, therefore no SD could be calculated.

**Table S7.** Standard deviation of estimation methods vs. experimental values in  $\log_{10}$  units regarding IDACs. The same convention for the colours is used as in Table S6.

| scope          | $N$ | evap<br>grom | evap<br>Cab | aqua | aiom | aiom(m) |
|----------------|-----|--------------|-------------|------|------|---------|
| all            | 243 | 0.43         | 0.39        | 0.45 | 0.32 | 0.30    |
| mono-aldehydes | 19  | 0.38         | 0.11        | 0.28 | 0.32 | 0.32    |
| mono-ketones   | 43  | 0.24         | 0.13        | 0.55 | 0.25 | 0.25    |
| mono-ethers    | 28  | 0.34         | 0.21        | 0.48 | 0.47 | 0.47    |
| mono-esters    | 31  | 0.33         | 0.30        | 0.22 | 0.16 | 0.16    |
| mono-formates  | 12  | 0.38         | 0.23        | 0.28 | 0.06 | 0.06    |
| mono-alcohols  | 85  | 0.37         | 0.25        | 0.53 | 0.31 | 0.32    |
| mono-acids     | 6   | 0.38         | 0.27        | 0.10 | 0.67 | 0.18    |
| diols          | 19  | 0.98         | 1.17        | 0.27 | 0.30 | 0.30    |
| scope          | $N$ | Nan/grom     | Nan/Cab     | dort | Han  | Raat    |
| all            | 243 | 0.46         | 0.44        | 0.35 | 0.36 | 1.12    |
| mono-aldehydes | 19  | 0.45         | 0.18        | 0.27 | 0.32 | 0.73    |
| mono-ketones   | 43  | 0.23         | 0.13        | 0.15 | 0.25 | 0.50    |
| mono-ethers    | 28  | 0.38         | 0.26        | 0.34 | 0.47 | 0.58    |
| mono-esters    | 31  | 0.36         | 0.32        | 0.33 | 0.16 | 0.48    |
| mono-formates  | 12  | 0.36         | 0.18        | 0.06 | 0.06 | 0.26    |
| mono-alcohols  | 85  | 0.49         | 0.41        | 0.28 | 0.37 | 1.45    |
| mono-acids     | 6   | 0.21         | 0.24        | 0.31 | 0.40 | 0.65    |
| diols          | 19  | 0.90         | 1.17        | 0.85 | 0.60 | 2.12    |

Method abbreviations are defined in Table S1.

lowest overall SD compared to the other methods, and the lowest number of molecule classes with 'large' (red in Tables S6 and S7) SDs (only one, for the functionalized acids, which are difficult for most methods). When focussing on the polyfunctional molecule classes, it remains the best method, as all other methods have at least two, and frequently more, molecule classes with 'large' SDs.



## References

- Bierwagen, B. G., and Keller, A. A.: Measurement of Henry's law constant for methyl tert-butyl ether using solid-phase microextraction., *Environ. Toxicol. Chem.*, 20, 1625–1629, 2001.
- Bruckmann, P. W., Willner, H.: Infrared spectroscopic study of peroxyacetyl nitrate (PAN) and its decomposition products, *Environ. Sci. Technol.*, 17, 352–357, 1983.
- 5 Cabani, S., Gianni, P., Mollica, V. and Lepori, L.: Group contributions to the thermodynamic properties of non-ionic organic solutes in dilute aqueous solution, *J. Solution Chem.*, 10, 563–595, 1981.
- Callender, T., and Davis, L.: Environmental behavior of methyl tert-butyl ether: A study of Henry's Law constant and the dispersion of MTBE through river bottom sand and soil, *Proceedings of the 2001 Conference on Environmental Research*, 2001.
- 10 Compernelle, S., Ceulemans, K., and Müller, J.-F.: EVAPORATION: a new vapour pressure estimation method for organic molecules including non-additivity and intramolecular interactions, *Atmos. Chem. Phys.*, 11, 9431-9450, 2011.
- Compernelle, S., Ceulemans, K., and Müller, J.-F.: Influence of non-ideality on condensation to aerosol, *Atmos. Chem. Phys.*, 9, 1325–1338, 2009.
- Compernelle, S., and Müller, J.-F.: Henry's law constants of diacids and hydroxy polyacids: recommended values, *Atmos. Chem. Phys.*, 14, 2699-2712, 2014a.
- 15 Compernelle, S., and Müller, J.-F.: Henry's law constants of polyols, *Atmos. Chem. Phys.*, 14, 12815-12837, 2014b.
- Egerton, A. C., Emte, W., and G. J. Minkoff, G. J.: Some properties of organic peroxides, *Discuss. Faraday Soc.*, 10, 278-282, 1951.
- Fredenslund, A., Gmehling, J., and Rasmussen, R.: Vapor-Liquid Equilibria Using Unifac: A Group-Contribution Method, Elsevier Science Ltd, Amsterdam, Oxford, New York, 1977.
- 20 Ganbavale, G., Marcolli, C., Krieger, U. K., Zuend, A., Stratmann, G., and Peter, T.: Experimental determination of the temperature dependence of water activities for a selection of aqueous organic solutions, *Atmos. Chem. Phys.*, 14, 9993–10012, 2014.
- Gmehling, J., Wittig, R., Lohmann, J., and Joh, R.: A Modified UNIFAC (Dortmund) Model. 4. Revision and Extension, *Ind. Eng. Chem. Res.*, 41, 1678–1688, 2002.
- Hansen, H. K., Rasmussen, P., Fredenslund, A., Schiller, M., and Gmehling, J.: Vapor-Liquid Equilibria By UNIFAC Group Contribution. 5. Revision And Extension, *Ind. Eng. Chem. Res.*, 30, 2352–2355, 1991.
- 25 Hilal, S. H., Ayyampalayam, S. N., and Carreira, L. A.: Air-liquid partition coefficient for a diverse set of organic compounds: Henry's Law Constant in water and hexadecane, *Environ. Sci. Technol.*, 42, 9231–9236, 2008.
- Jain, P., Sepassi, K., and Yalkowsky, S. H.: Comparison of aqueous solubility estimation from AQUAFAC and the GSE, *Int. J. Pharm.*, 360, 122–147, 2008.
- 30 Kojima, K., Zhang, S., and Hiaki, T.: Measuring methods of infinite dilution activity coefficients and a database for systems including water, *Fluid Phase Equilib.*, 131, 145–179, 1997.
- Kutsuna, S., Chen, L., Abe, T., Mizukado, J., Uchimar, T., Tokuhashi, K., and Sekiya, A.: Henry's law constants of 2,2,2-trifluoroethyl formate, ethyl trifluoroacetate, and non-fluorinated analogous esters, *Atmos. Environ.*, 39, 5884–5892, 2005.
- Marcolli, C., and Peter, T.: Water activity in polyol/water systems: new UNIFAC parameterization, *Atmos. Chem. Phys.*, 5, 1545–1555, 2005.
- 35 Meylan, W. M., Howard, P. H.: Src's epi suite, v3.20 (Technical Report), Syracuse Research Corporation, Syracuse, New York, 2000.
- Nannoolal, Y., Rarey, J., Ramjugernath, D., Cordes, W.: Estimation of pure component properties: Part 1. Estimation of the normal boiling point of non-electrolyte organic compounds via group contributions and group interactions, *Fluid Phase Equilib.*, 224, 45–63, 2004.
- Nannoolal, Y., Rarey, J., and Ramjugernath, D.: Estimation of pure component properties: Part 3. Estimation of the vapor pressure of non-electrolyte organic compounds via group contributions and group interactions, *Fluid Phase Equilib.*, 269, 117–133, 2008.
- 40 Peng, C., Chan, M. N., and Chan, C. K.: The hygroscopic properties of dicarboxylic and multifunctional acids: Measurements and UNIFAC predictions, *Environ. Sci. Technol.*, 35, 4495–4501, 2001.
- Raatikainen, T., Laaksonen, A.: Application of several activity coefficient models to water-organic-electrolyte aerosols of atmospheric interest, *Atmos. Chem. Phys.*, 5, 2475–2495, 2005.
- Raventos-Duran, T. and Camredon, M. and Valorso, R. and Mouchel-Vallon, C. and Aumont, B.: Structure-activity relationships to estimate the effective Henry's law constants of organics of atmospheric interest, *Atmos. Chem. Phys.*, 10, 7643–7654, 2010.
- 45 Sander, R.: Compilation of Henry's law constants (version 4.0), *Atmos. Chem. Phys.*, 15, 4399-981, 2015.
- Suleiman, D., and Eckert, C. A.: Limiting activity coefficients of diols in water by a dew point technique, *J. Chem. Eng. Data*, 39, 692-696, 1994.
- Zuend, A., Marcolli, C., Booth, A. M., Lienhard, D. M., Soonsin, V., Krieger, U. K., Topping, D. O., McFiggans, G., Peter, T., and Seinfeld, J. H.: New and extended parameterization of the thermodynamic model AIOMFAC: calculation of activity coefficients for organic-inorganic mixtures containing carboxyl, hydroxyl, carbonyl, ether, ester, alkenyl, alkyl, and aromatic functional groups, *Atmos. Chem. Phys.*, 11, 9155–9206, 2011.
- 50
